# Supplementary material
Source: Springer Nature journal article supplement (https://www.springermedizin.de/resource/supplementary/12879_2012_2047_MOESM1_ESM.pdf/9443580)

Punjab

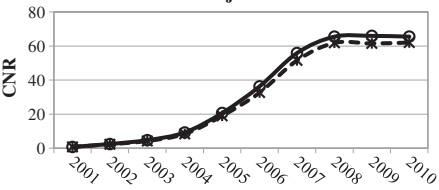

KPK

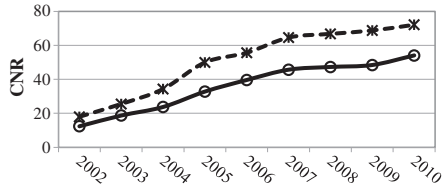

Sindh

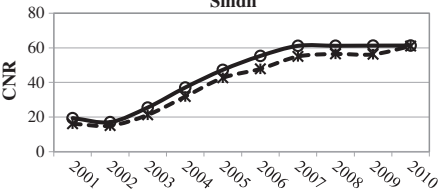

Baluchistan

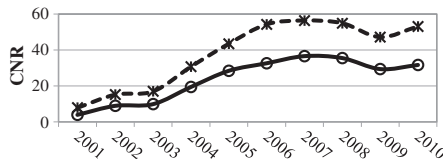

† Pakistan

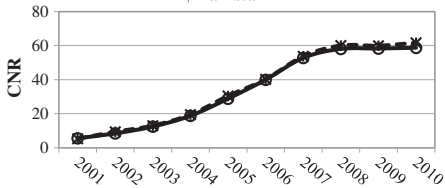

—○— MALE    - - - \* - - - FEMALE

Supplement: MOESM1 [file 9443580]
